# Supplementary material for: Life Science Undergraduate Mentors in NE STEM 4U Significantly Outperform Their Peers in Critical Thinking Skills
Source: Atypon-hosted journal article supplement (doi:10.1187/cbe.18-03-0038), 2018-10-18
Supplement: combinedsupmats.pdf [file combinedsupmats.pdf]

# Supplemental Material

*CBE—Life Sciences Education*

Nelson *et al.*

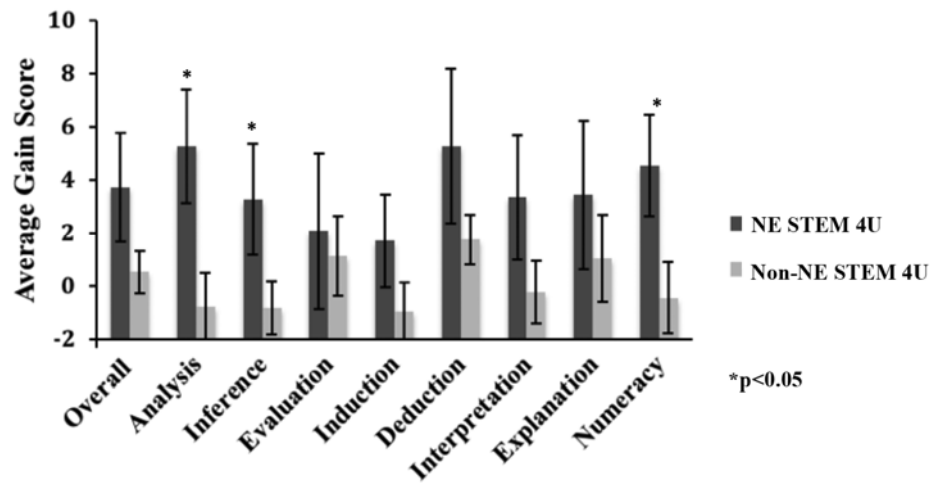

**Supplemental Figure 1.** Summary of average gain scores for NE STEM 4U mentors versus non-mentor majors that did not participate (all other factors normalized). Average gain scores (i.e., difference between post- and pre-test) and 95% confidence intervals were calculated for the overall score and eight subscale scores of the CCTST for both NE STEM 4U mentors and non-mentor life science majors. Notably, average mentor gains were at least two points greater than any non-mentor gains for all components of the CCTST except evaluation. Average gains were significantly different between mentors and non-mentors for: analysis, inference, and numeracy.

**Supplemental Table 1.** Demographics of NE STEM 4U mentors and non-mentors.

| Student Type                 | Sex  |        | Ethnicity<br>White/Black/Hispanic/Asian | Year in School<br>Fr/Soph/Jr/Se |
|------------------------------|------|--------|-----------------------------------------|---------------------------------|
|                              | Male | Female |                                         |                                 |
| <b>Mentor<br/>(n=11)</b>     | 5    | 6      | 7/0/1/3                                 | 1/4/2/4                         |
| <b>Non-mentor<br/>(n=26)</b> | 12   | 14     | 19/1/1/5                                | 3/8/5/10                        |

**Supplemental Table 2.** Descriptive statistics of CCTST scores for NE STEM 4U mentors and non-mentors life science majors who participated in this study.

|                | Mentor (N= 11)          |                          | Non-mentor (N = 26)     |                          |
|----------------|-------------------------|--------------------------|-------------------------|--------------------------|
|                | Pre-test<br>(mean ± SE) | Post-test<br>(mean ± SE) | Pre-test<br>(mean ± SE) | Post-test<br>(mean ± SE) |
| Overall        | 78.55 ± 2.87            | 82.27 ± 1.76             | 73.19 ± 1.48            | 73.73 ± 1.51             |
| Analysis       | 78.55 ± 3.02            | 83.82 ± 2.31             | 72.42 ± 1.86            | 71.65 ± 1.86             |
| Inference      | 81.18 ± 2.86            | 84.45 ± 1.80             | 73.69 ± 1.83            | 72.88 ± 1.53             |
| Evaluation     | 76.09 ± 2.64            | 78.18 ± 2.17             | 72.23 ± 1.28            | 73.38 ± 1.44             |
| Induction      | 81.91 ± 2.80            | 83.64 ± 1.82             | 76.88 ± 1.31            | 75.96 ± 1.60             |
| Deduction      | 75.73 ± 2.90            | 81.00 ± 2.51             | 70.62 ± 1.52            | 72.38 ± 1.33             |
| Interpretation | 81.82 ± 2.63            | 85.18 ± 2.42             | 75.27 ± 1.51            | 75.04 ± 1.71             |
| Explanation    | 76.64 ± 2.99            | 80.09 ± 1.88             | 73.92 ± 1.92            | 74.96 ± 1.75             |
| Numeracy       | 77.09 ± 2.89            | 81.64 ± 2.35             | 70.12 ± 1.75            | 69.69 ± 1.36             |
